# Supplementary material for: Determination of IgG1 and IgG3 SARS-CoV-2 Spike Protein and Nucleocapsid Binding—Who Is Binding Who and Why?
Source: MDPI journal article supplement (doi:10.3390/ijms23116050), 2022-05-27
Supplement: s1 [file s1]

| Cohort   | n  | Sex %<br>male<br>(M:F) | Median<br>age yrs.<br>(95%CI) | Ethnicity      |       |       |       |       |
|----------|----|------------------------|-------------------------------|----------------|-------|-------|-------|-------|
|          |    |                        |                               | white          | mixed | Asian | black | other |
| HCW-ve   | 30 | 13%<br>(4:26)          | 40<br>(36-45)                 | 27             | 1     | 2     | 0     | 0     |
| HCW+ve   | 32 | 25%<br>(8:24)          | 44<br>(41-48)                 | 26             | 1     | 4     | 1     | 0     |
| COVID-19 | 37 | 72%<br>(27:10)         | 52<br>(48-56)                 | 31             | 1     | 4     | 0     | 1     |
|          |    | <i>p</i> < 0.001       | <i>p</i> <0.01                | <i>p</i> =0.73 |       |       |       |       |

| Co-morbidities COVID-19 cohort |       |
|--------------------------------|-------|
| Hypertension                   | 48.6% |
| Obesity (BMI>30)               | 35.1% |
| Type 2 Diabetes                | 29.7% |
| Respiratory Disease            | 8.1%  |
| Heart Disease                  | 8.1%  |

Figure s1 – Demographic details (sex, age and ethnicity) of the study cohort. HCW -ve are health care workers who were not antibody, antigen or PCR positive for SARS-Cov2 infection. HCW+ve are health care workers who were antibody, antigen or PCR positive for SARS-CoV2 infection. COVID-19 refers to patients confirmed positive for SARS-CoV2 and who had been admitted with acute respiratory distress syndrome (ARDS) to intensive care at Papworth Hospital, Cambridge, UK. The co-morbidities sub table in the figure refers to the prevailing health conditions recorded for COVID-19 ARDS patient - cohort only.
